# Supplementary material
Source: PubMed Central journal article supplement (PMC4121834)
Supplement: 1411679111_pnas.201411679SI.pdf [file 1411679111_pnas.201411679SI.pdf]

# Supporting Information

Lee et al. 10.1073/pnas.1411679111

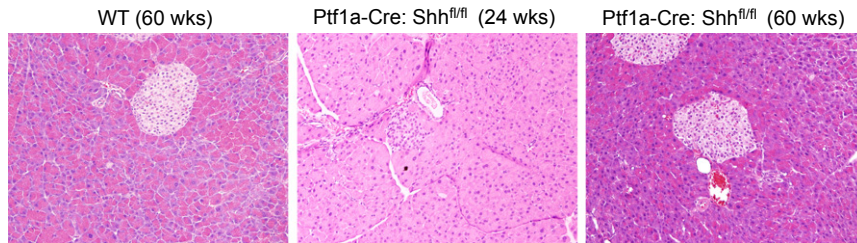

**Fig. S1.** Deletion of *Shh* is dispensable for normal pancreas development. Representative histology of pancreata from a 60-wk-old wild-type mouse (Left), 24-wk-old *Ptf1a-Cre:Shh<sup>fl/fl</sup>* mouse (Center), and 60-wk-old *Ptf1a-Cre:Shh<sup>fl/fl</sup>* mouse (Right).

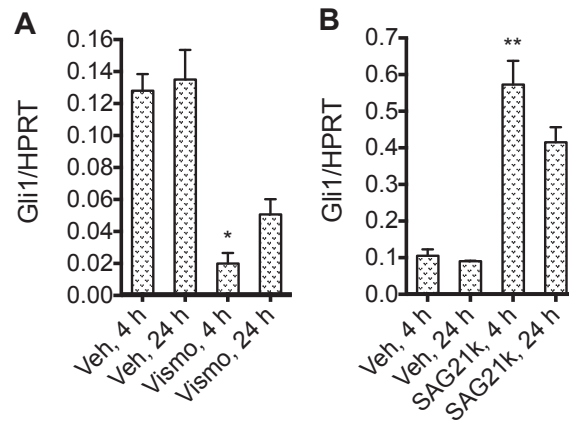

**Fig. S2.** Pharmacologic modulation of Hh pathway response in mice. (A) Normalized *Gli1* expression in pancreata of 9-wk-old male FVB mice given either MCT vehicle ( $n = 3$ ) or vismodegib at 100 mg/kg ( $n = 3$ ) by oral gavage daily for 5 d. Pancreata were harvested either 4 h or 24 h after the last dose of drug as shown. A 6.4-fold relative reduction of *Gli1* expression was observed in vismodegib-treated mice (Veh 4 h vs. Vismo 4 h,  $*P = 0.0001$ ). (B) Normalized *Gli1* expression in pancreata of 9-wk-old male FVB mice given either MCT vehicle ( $n = 3$ ) or SAG21k at 5 mg/kg ( $n = 3$ ) by oral gavage daily for 5 d. Pancreata were harvested either 4 h or 24 h after the last dose of drug as shown. A 5.5-fold relative increase in *Gli1* expression was observed in SAG21k-treated mice (Veh 4 h vs. SAG21k 4 h,  $**P = 0.002$ ). Error bars indicate SEM.

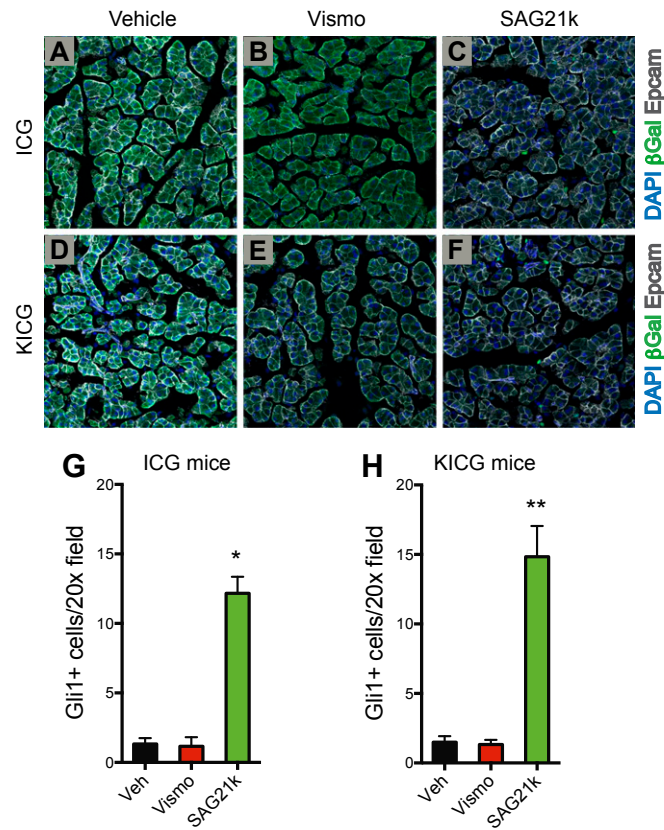

**Fig. S3.** Modulation of Hh response without concomitant cerulein controls the number of *Gli1*<sup>+</sup> cells in pancreata. (A–C and G) ICG mice were treated as in Fig. 4, except that cerulein was not administered. Vismodegib does not alter significantly the number of *Gli1*<sup>+</sup> cells. However, SAG21k increases the number of *Gli1*<sup>+</sup> cells by 9.1-fold (\**P* < 0.0001, *n* = 6). Error bars indicate SEM. (D–F and H) KICG mice were similarly examined. Likewise, vismodegib does not alter the number of *Gli1*<sup>+</sup> cells whereas SAG21k increases the number by 9.9-fold (\*\**P* < 0.0001, *n* = 6). Error bars indicate SEM.

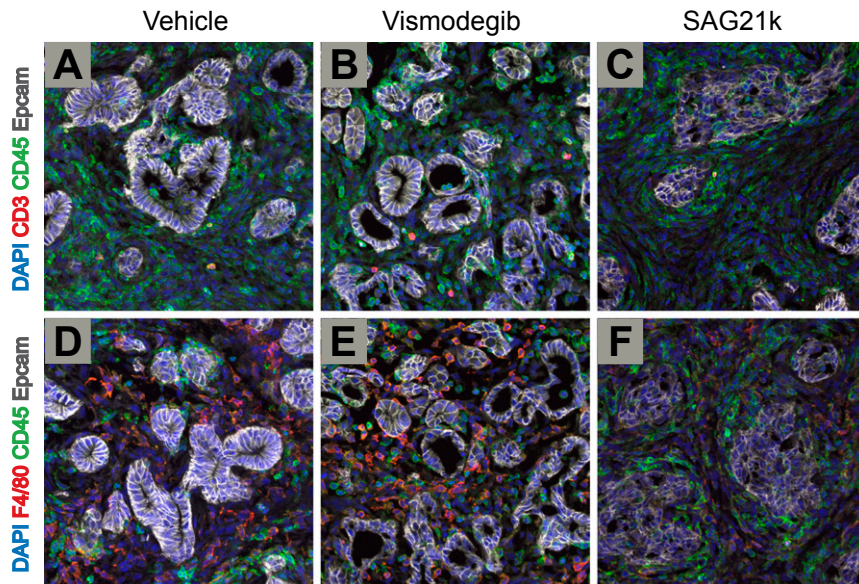

**Fig. S4.** Identity of CD45-positive hematopoietic cells during cerulein-enhanced oncogenesis. (A–F) Confocal images of pancreata of cerulein-treated KICG mice are shown. (A–C) CD3<sup>+</sup> T cells (orange or yellow) represent a minor fraction of the CD45<sup>+</sup> inflammatory infiltrate in vehicle-, vismodegib-, and SAG21k-treated mice. (D–F) F4/80<sup>+</sup> macrophages (orange or yellow) also represent a fraction of CD45<sup>+</sup> cells but appear more prevalent than CD3<sup>+</sup> cells under all three treatment conditions. (C and F) Notably, the zone of CD45<sup>+</sup> cells around globular epithelial structures in SAG21k-treated mice does not contain a predominance of either CD3<sup>+</sup> or F4/80<sup>+</sup> cells.
